# Supplementary material for: Pharmacological and In Silico Analysis of Oat Avenanthramides as EGFR Inhibitors: Effects on EGF-Induced Lung Cancer Cell Growth and Migration
Source: Int J Mol Sci. 2022 Aug 1;23(15):8534. doi: 10.3390/ijms23158534 (PMC9369115; doi:10.3390/ijms23158534)
Supplement: Supplementary file 1 [file ijms-23-08534-s001.zip]

Archive with 4 entries (4 files):
- ijms-1828601-supplementary.pdf
- Video S1 A.mpg
- Video S1 B.mpg
- Video S1.mp4
